# Supplementary figures and images for: PDGF signalling controls the migration of mesoderm cells during chick gastrulation by regulating N-cadherin expression
Source: Oxford University Press journal article supplement (doi:10.1242/dev.023416), 2008-10-03

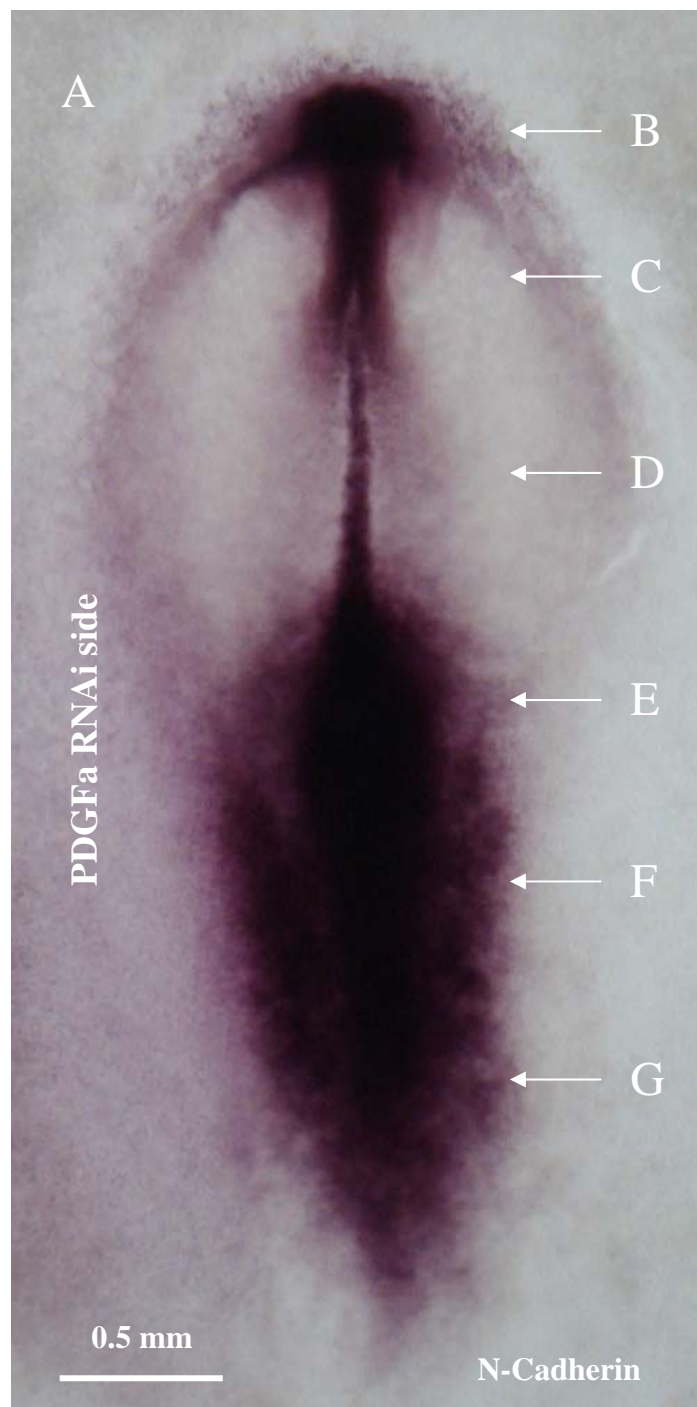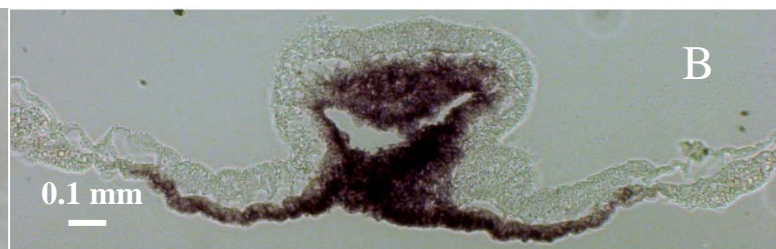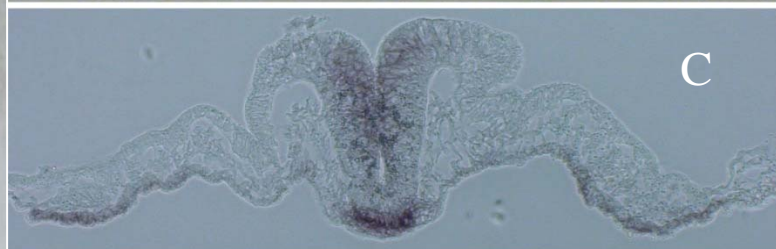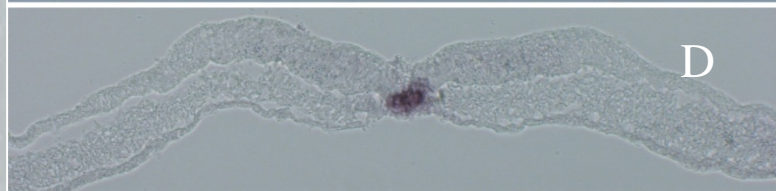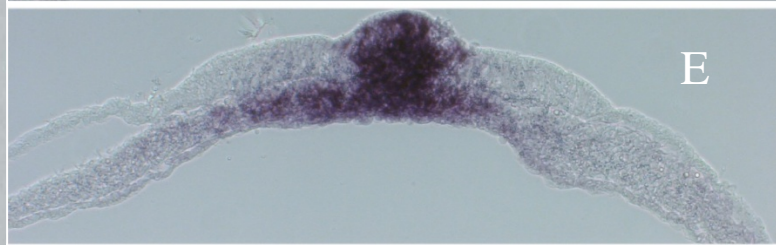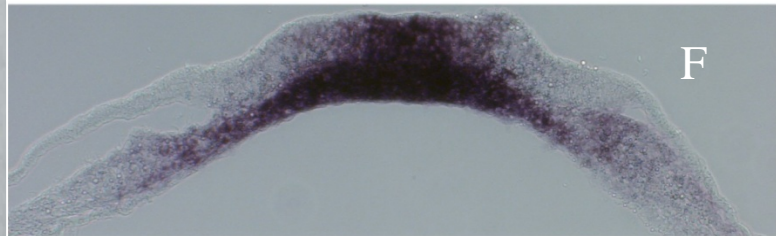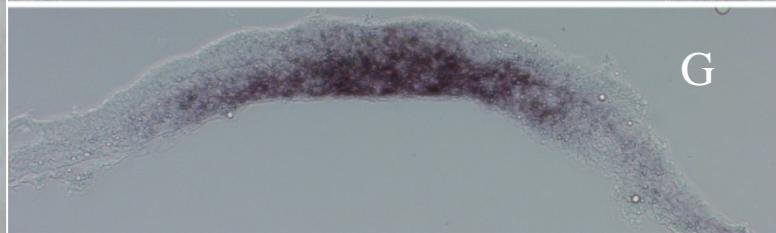

Supplement: dev023416-sup-023416figs2.pdf [file dev023416-sup-023416figs2.pdf]
